# Supplementary material for: Quality of care, resource use and patient outcome by use of emergency response team compared with standard care for critically ill medical patients in the emergency department: a retrospective single-centre cohort study from Norway
Source: HighWire-hosted journal article supplement (doi:10.1136/bmjopen-2020-047264), 2021-08-01
Supplement: bmjopen-2020-047264supp002_data_supplement.pdf [file bmjopen-2020-047264supp002_data_supplement.pdf]

## Supplement 2. Sensitivity analysis, also adjusting all outcomes for presenting complaint

| Outcomes                                                     | Adjusted OR (CI) <sup>1</sup> |
|--------------------------------------------------------------|-------------------------------|
| <b>Quality of care:</b>                                      |                               |
| Complete set of vital signs <sup>a</sup>                     | 1.476 (1.048-2.079)*          |
| Pain assessment documented <sup>a</sup>                      | 0.071 (0.036-0.139)**         |
| Analgesic within 20 minutes <sup>a</sup> (n=266)             | 3.260 (1.318-8.064)*          |
| Antibiotics within 60 minutes if sepsis <sup>a</sup> (n=167) | 11.951 (4.490-31.811)**       |
| <b>Resource use:</b>                                         |                               |
| Diagnostic interventions > 3 <sup>a</sup>                    | 0.804 (0.552-1.171)           |
| Critical care in ED                                          | 10.138 (6.969-14.752)**       |
| ED LOS < 180 minutes <sup>b</sup>                            | 3.192 (2.146-4.749)**         |
| <b>Patient outcome:</b>                                      |                               |
| ICU admittance <sup>a</sup>                                  | 2.864 (1.962-4.181)**         |
| ICU LOS < 66 hours <sup>a</sup> (n=457)                      | 0.736 (0.377-1.439)           |
| Hospital LOS < 194 hours <sup>b</sup>                        | 0.991 (0.672-1.462)           |
| Mortality <sup>b</sup>                                       | 1.859 (1.072-3.221)*          |

OR: Odds ratio, CI: confidence interval, ED: emergency department, LOS: length of stay, ICU: intensive care unit, \*p<0.05, \*\*p<0.001

<sup>1</sup> all adjusted for age, gender, Charlson comorbidity score, substance abuse or psychiatric history, deranged vital signs and presenting complaint

<sup>a</sup> adjusted for critical care in ED

<sup>b</sup> adjusted for critical care in ED and/or ICU admission
